# Supplementary material for: Geometrical influence on the non-biomimetic heterolytic splitting of H2 by bio-inspired [FeFe]-hydrogenase complexes: a rare example of inverted frustrated Lewis pair based reactivity
Source: Royal Society of Chemistry journal article supplement (doi:10.1039/d1sc06975f), 2022-01-01
Supplement: d1sc06975f1.pdf [file d1sc06975f1.pdf]

## Supporting information for the manuscript

### **Geometrical Influence on Non-Biomimetic Heterolytic Splitting of H<sub>2</sub> by Bio-Inspired [FeFe]-Hydrogenase Complexes: a rare example of *inverted* Frustrated Lewis Pair based reactivity.**

Lucile Chatelain,<sup>\*a</sup> Jean-Baptiste Breton,<sup>a</sup> Federica Arrigoni,<sup>\*b</sup> Philippe Schollhammer<sup>\*a</sup> and Giuseppe Zampella<sup>\*b</sup>

<sup>a</sup> UMR CNRS 6521 Chimie, Electrochimie Moléculaires et Chimie Analytique, Université de Bretagne Occidentale, UFR Sciences et Techniques, 6 Avenue Victor le Gorgeu, CS 93837, Brest-Cedex 3, 29238 France

<sup>b</sup> Department of Biotechnology and Bioscience, University of Milano-Bicocca, Piazza della Scienza 2, 20126 Milan, Italy

## Contents

|                             |    |
|-----------------------------|----|
| Contents .....              | 2  |
| I. NMR spectra .....        | 3  |
| II. IR spectra .....        | 16 |
| III. DFT calculations ..... | 17 |

# I. NMR spectra

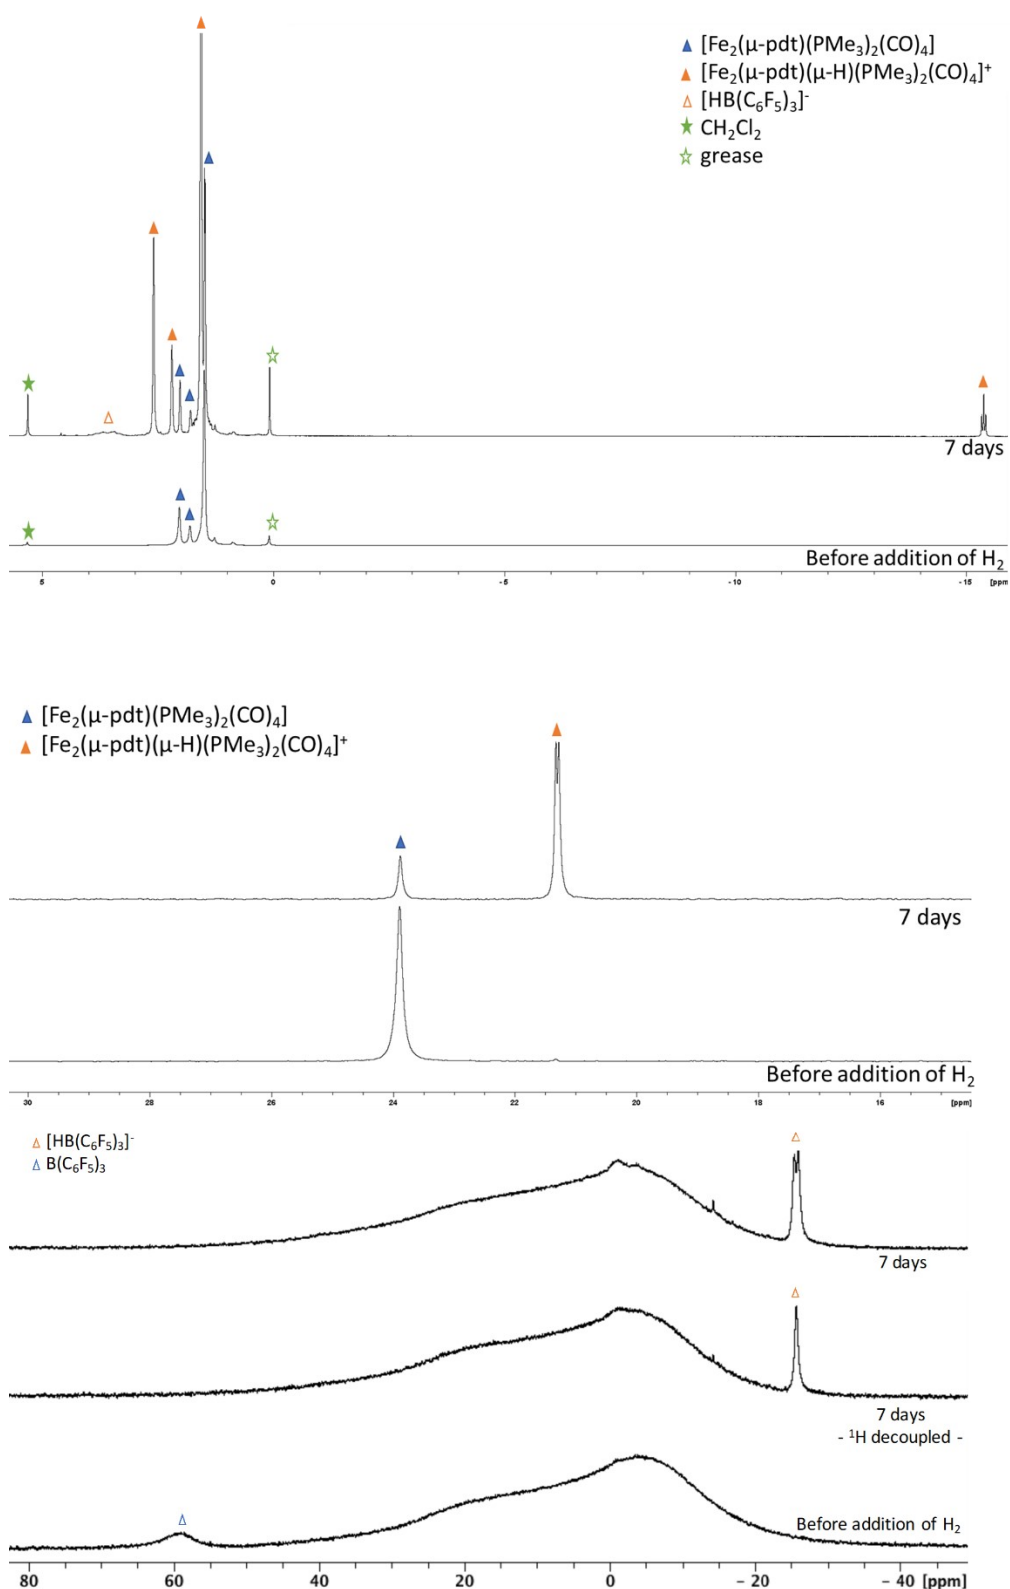

Figure S1:  $^1\text{H}$  (400 MHz) (top),  $^{31}\text{P}$  (161.97 MHz) (middle) and  $^{11}\text{B}$  (128.38 MHz) (bottom) NMR spectra of a 1:1 solution of  $[\text{Fe}_2(\mu\text{-pdt})(\text{PMe}_3)_2(\text{CO})_4] : \text{B}(\text{C}_6\text{F}_5)_3$  in  $\text{CD}_2\text{Cl}_2$  exposed 7 days to  $\text{H}_2$

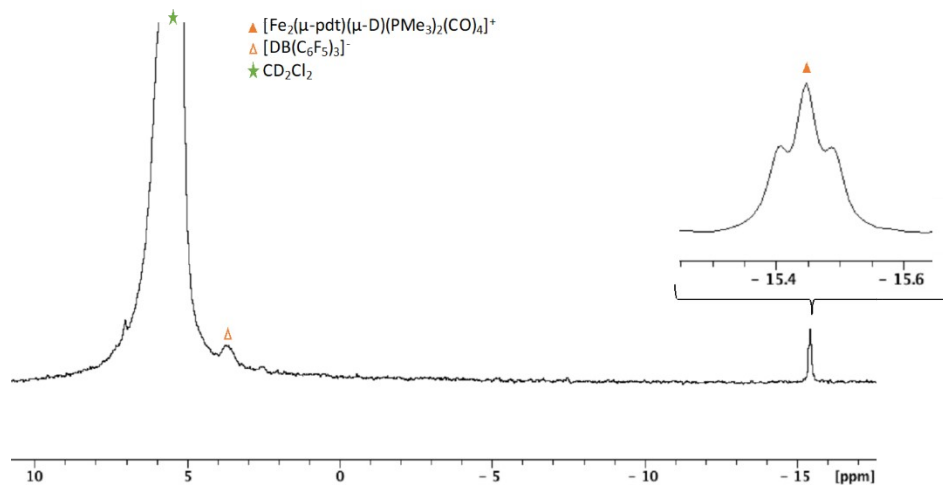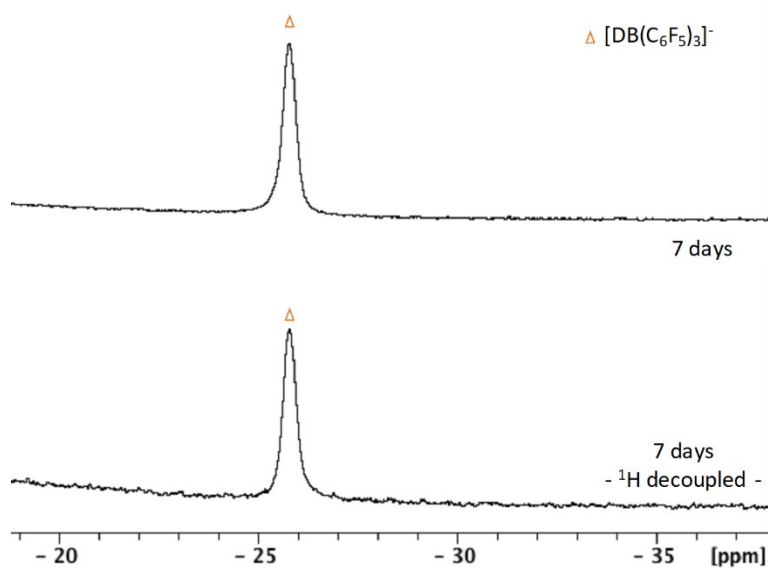

Figure S2:  $^2\text{H}$  (76.77 MHz) (top) and  $^{11}\text{B}$  (160.46 MHz) (bottom) NMR spectra of a 1:1 solution of  $[\text{Fe}_2(\mu\text{-pdt})(\text{PMe}_3)_2(\text{CO})_4] : \text{B}(\text{C}_6\text{F}_5)_3$  in  $\text{CD}_2\text{Cl}_2$  exposed 7 days to  $\text{D}_2$

NMR of the isolated product  $[\text{Fe}_2(\mu\text{-pdt})(\mu\text{-H})(\text{PMe}_3)_2(\text{CO})_4][\text{HB}(\text{C}_6\text{F}_5)_3]$

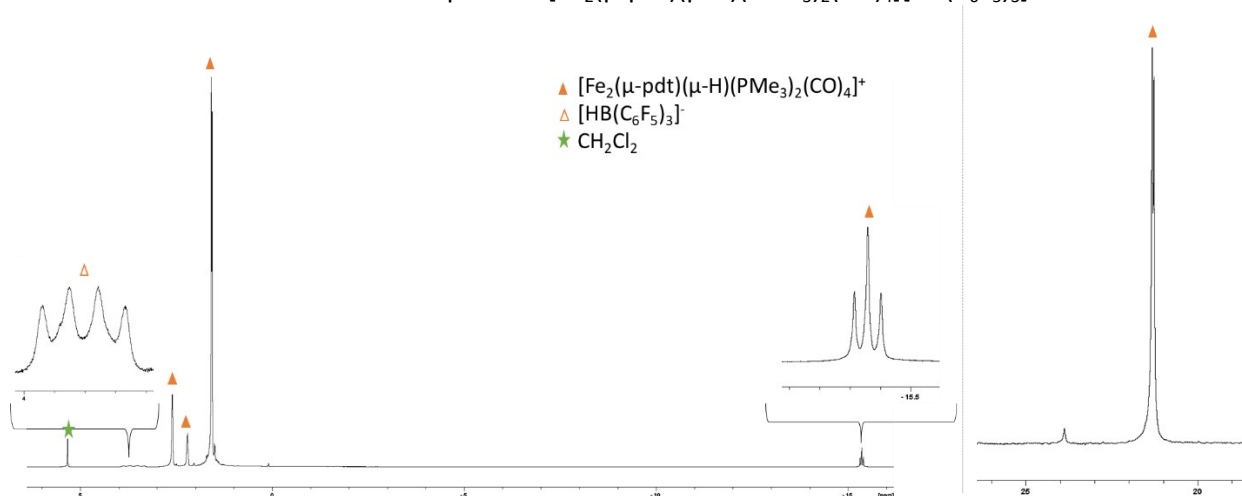

Figure S3: NMR (298K,  $\text{CD}_2\text{Cl}_2$ ) spectra of  $[\text{Fe}_2(\mu\text{-pdt})(\mu\text{-H})(\text{PMe}_3)_2(\text{CO})_4][\text{HB}(\text{C}_6\text{F}_5)_3]$  (left)  $^1\text{H}$  (500 MHz) and (right)  $^{31}\text{P}$  (202.46 MHz)

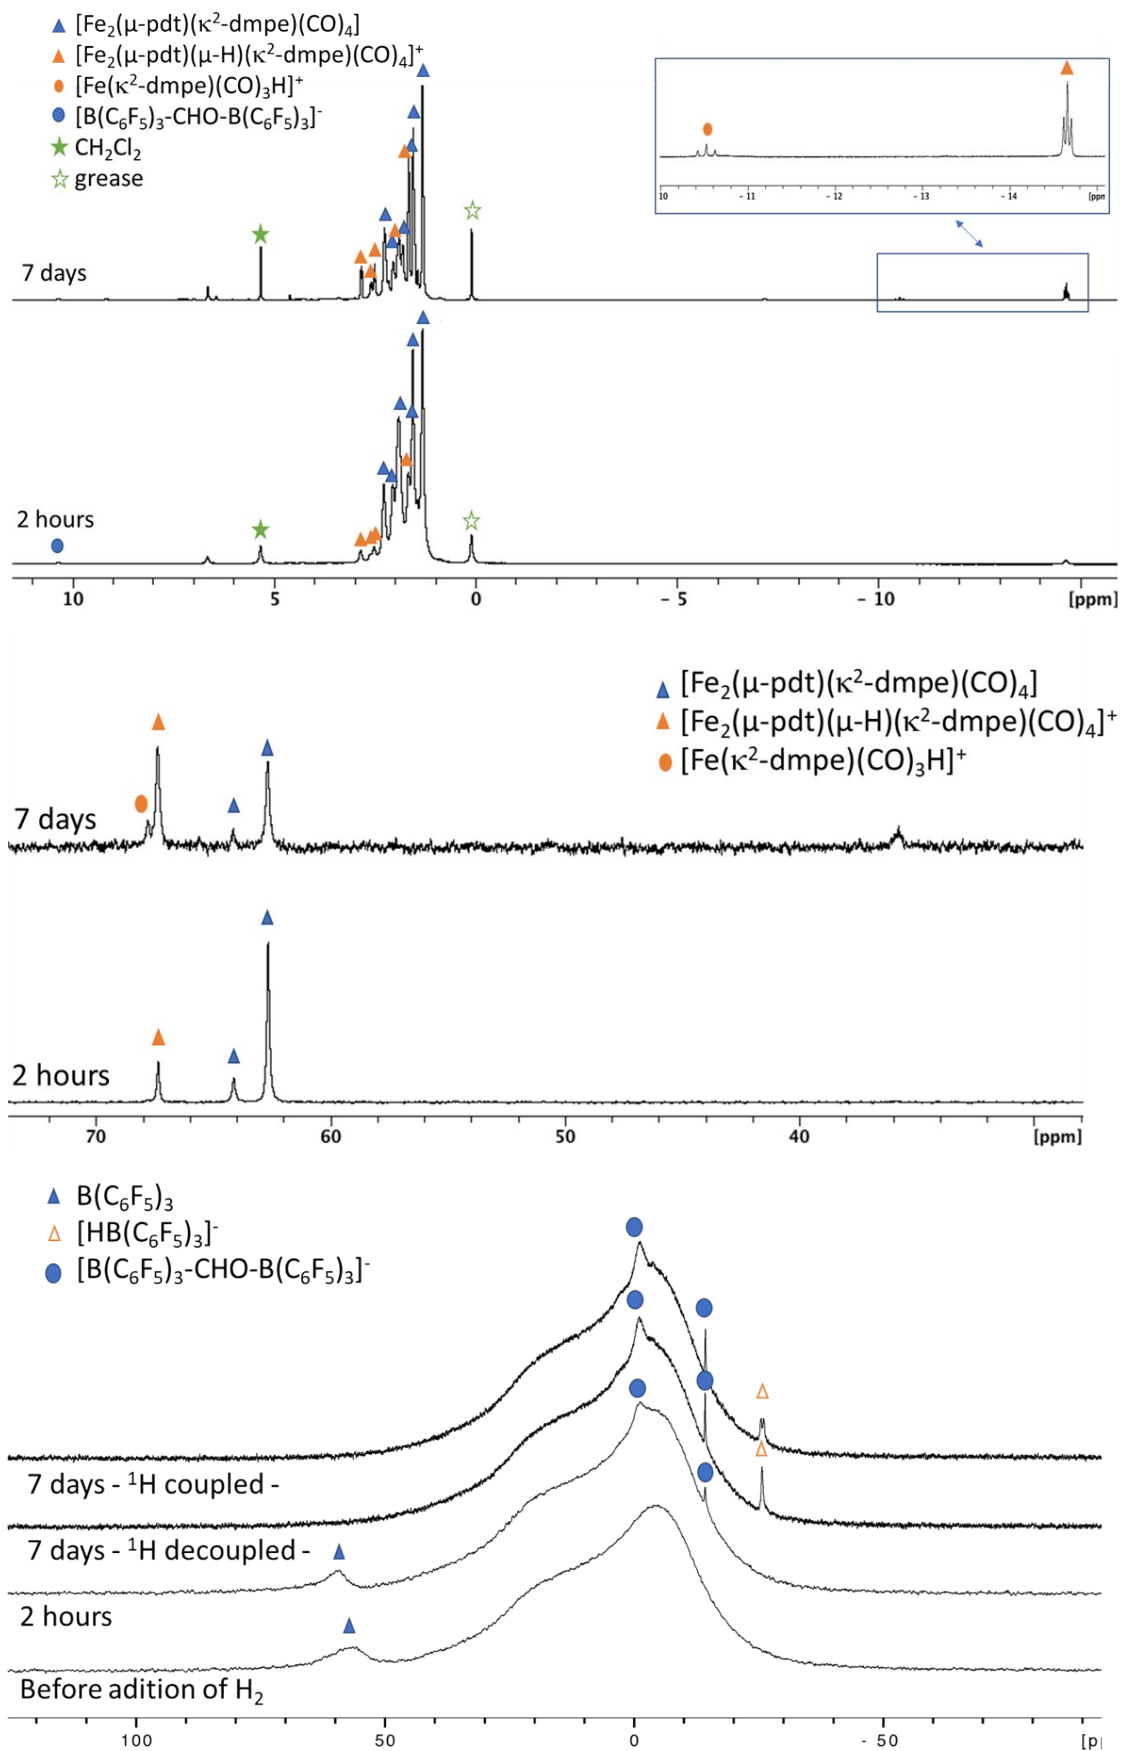

Figure S4: NMR (298K,  $\text{CD}_2\text{Cl}_2$ ) spectra of a mixture of  $\text{B}(\text{C}_6\text{F}_5)_3$  and  $[\text{Fe}_2(\mu\text{-pdt})(\kappa^2\text{-dmpe})(\text{CO})_4]$  in presence of  $\text{H}_2$ : (top)  $^1\text{H}$  (500 MHz), (middle)  $^{31}\text{P}$  (202.46 MHz) and (bottom)  $^{11}\text{B}$  (160.46 MHz)

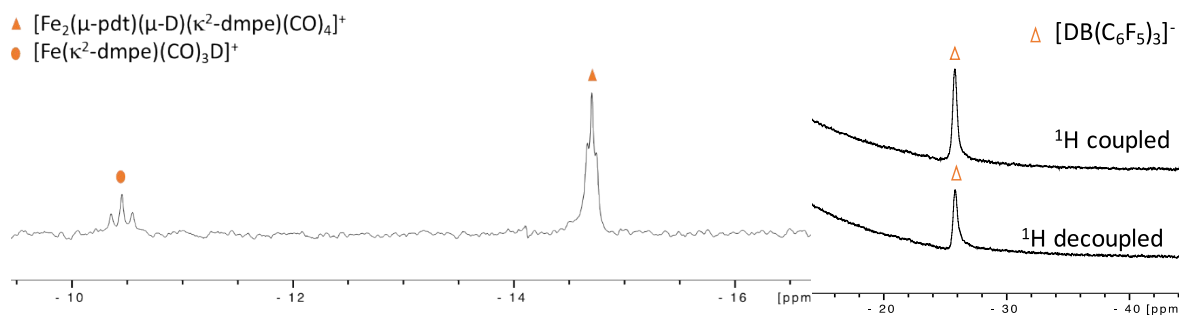

Figure S5: NMR spectra of the solid dissolved in  $\text{CD}_2\text{Cl}_2$  after the reaction of  $\text{B}(\text{C}_6\text{F}_5)_3$  and  $[\text{Fe}_2(\mu\text{-pdt})(\kappa^2\text{-dmpe})(\text{CO})_4]^+$  in presence of  $\text{D}_2$  in  $\text{CD}_2\text{Cl}_2$ : (left)  $^2\text{H}$  (76.77 MHz) and (right)  $^{11}\text{B}$  (28.38 MHz)

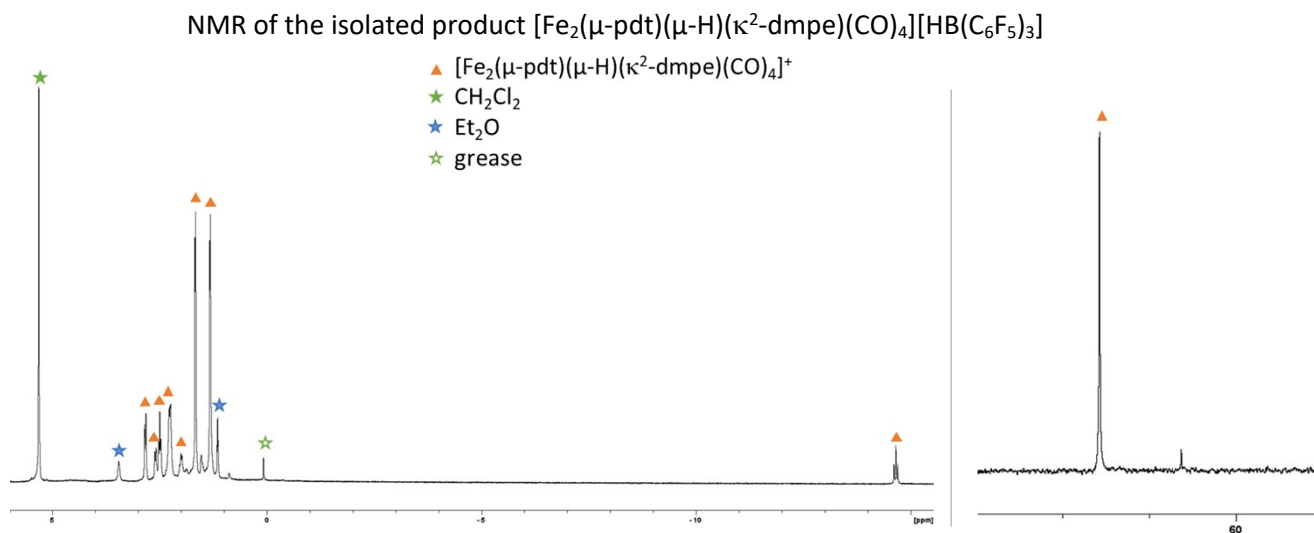

Figure S6: NMR (298K,  $\text{CD}_2\text{Cl}_2$ ) spectra of  $[\text{Fe}_2(\mu\text{-pdt})(\mu\text{-H})(\kappa^2\text{-dmpe})(\text{CO})_4][\text{HB}(\text{C}_6\text{F}_5)_3]$  (left)  $^1\text{H}$  (500 MHz) and (right)  $^{31}\text{P}$  (202.46 MHz)

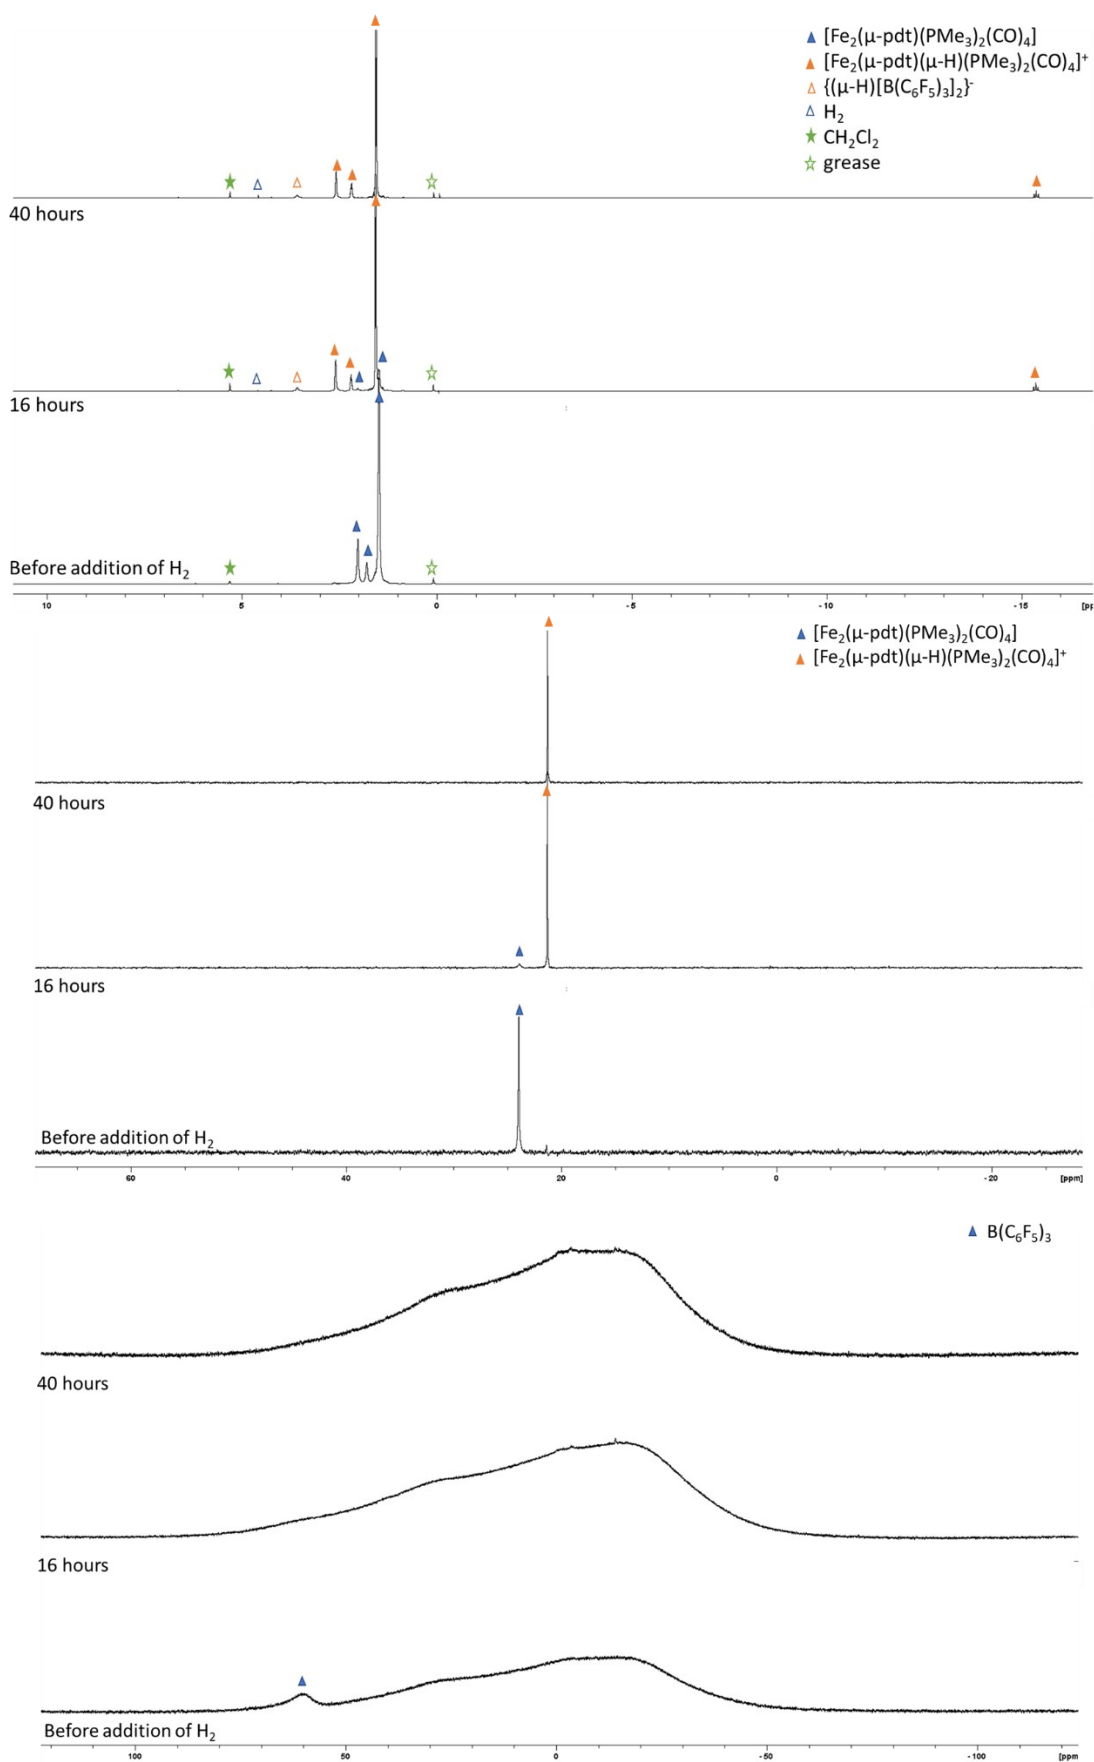

Figure S7:  $^1\text{H}$  (400 MHz) (top),  $^{31}\text{P}$  (161.97 MHz) (middle) and  $^{11}\text{B}$  (128.38 MHz) (bottom) NMR spectra of a 1:2 solution of  $[\text{Fe}_2(\mu\text{-pdt})(\text{PMe}_3)_2(\text{CO})_4] : \text{B}(\text{C}_6\text{F}_5)_3$  in  $\text{CD}_2\text{Cl}_2$  exposed 2 days to  $\text{H}_2$  at 298 K

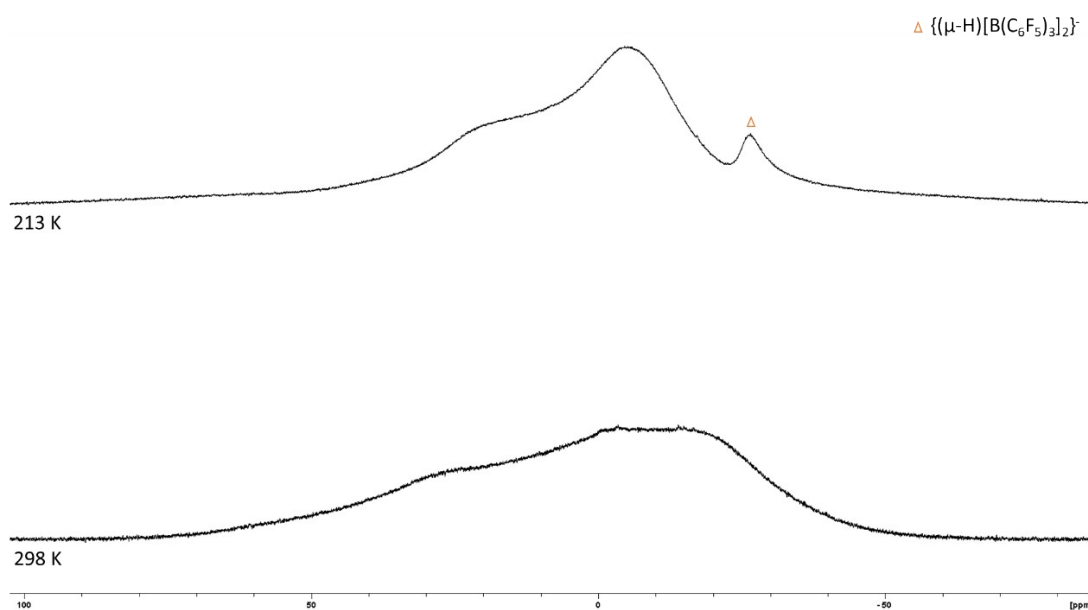

Figure S8:  $^{11}\text{B}$  (128.38 MHz (bottom) and 160.46 MHz (top)) NMR spectra of a 1:2 solution of  $[\text{Fe}_2(\mu\text{-pdt})(\text{PMe}_3)_2(\text{CO})_4] : \text{B}(\text{C}_6\text{F}_5)_3$  in  $\text{CD}_2\text{Cl}_2$  after 2 days of  $\text{H}_2$  exposure recorded at 298 K and 213 K



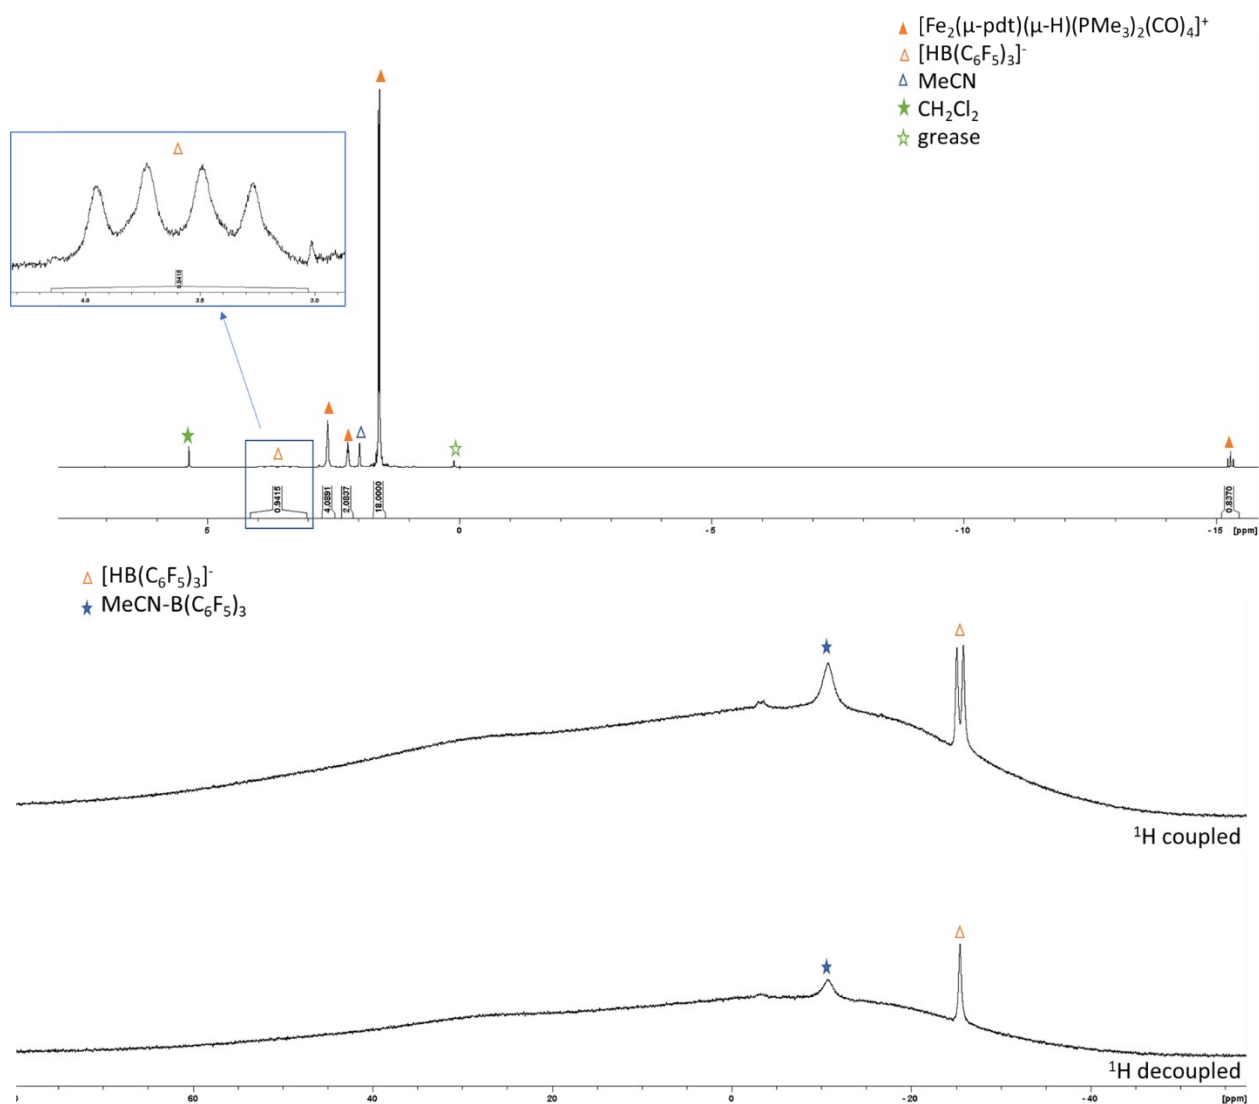

Figure S9:  $^1\text{H}$  (500 MHz) (top) and  $^{11}\text{B}$  (160.46 MHz) (bottom) NMR spectra of a solution of  $[\text{Fe}_2(\mu\text{-pdt})(\text{PMe}_3)_2(\text{CO})_4][(\text{C}_6\text{F}_5)_3\text{B}-(\mu\text{-H})-\text{B}(\text{C}_6\text{F}_5)_3]$  in  $\text{CD}_2\text{Cl}_2$  after addition of MeCN at 298 K

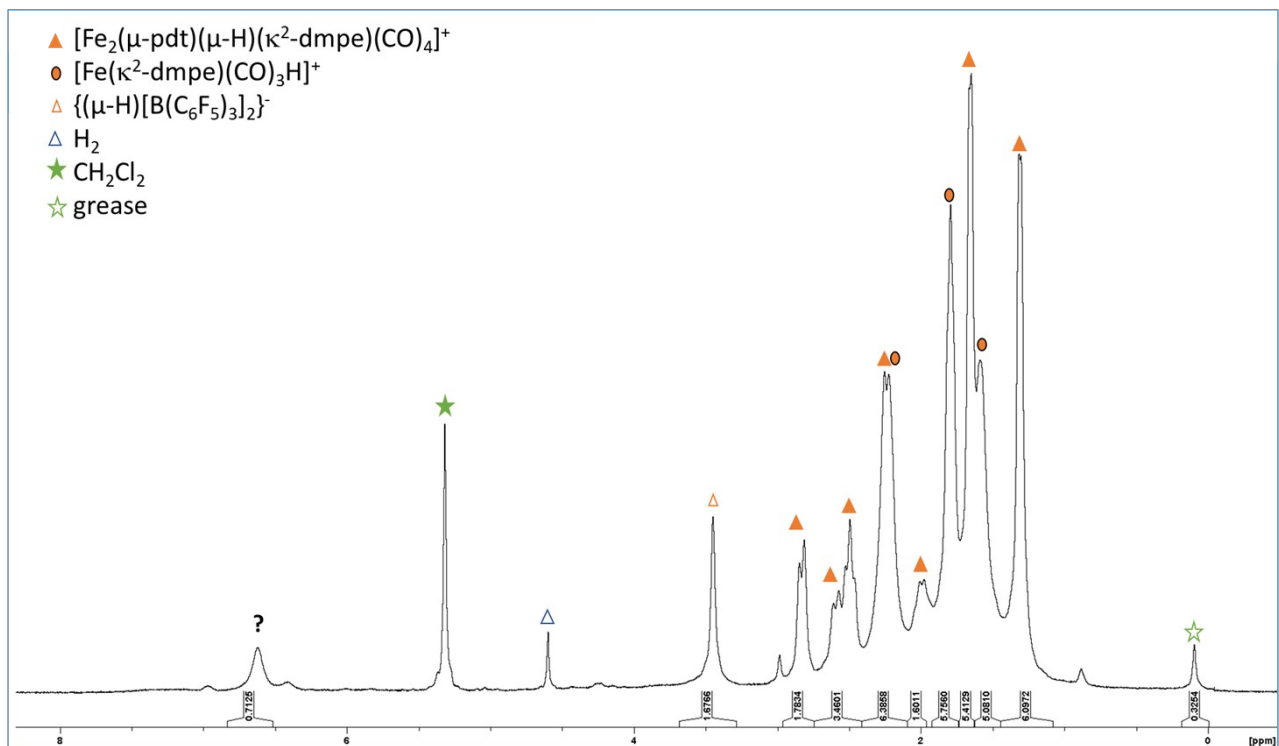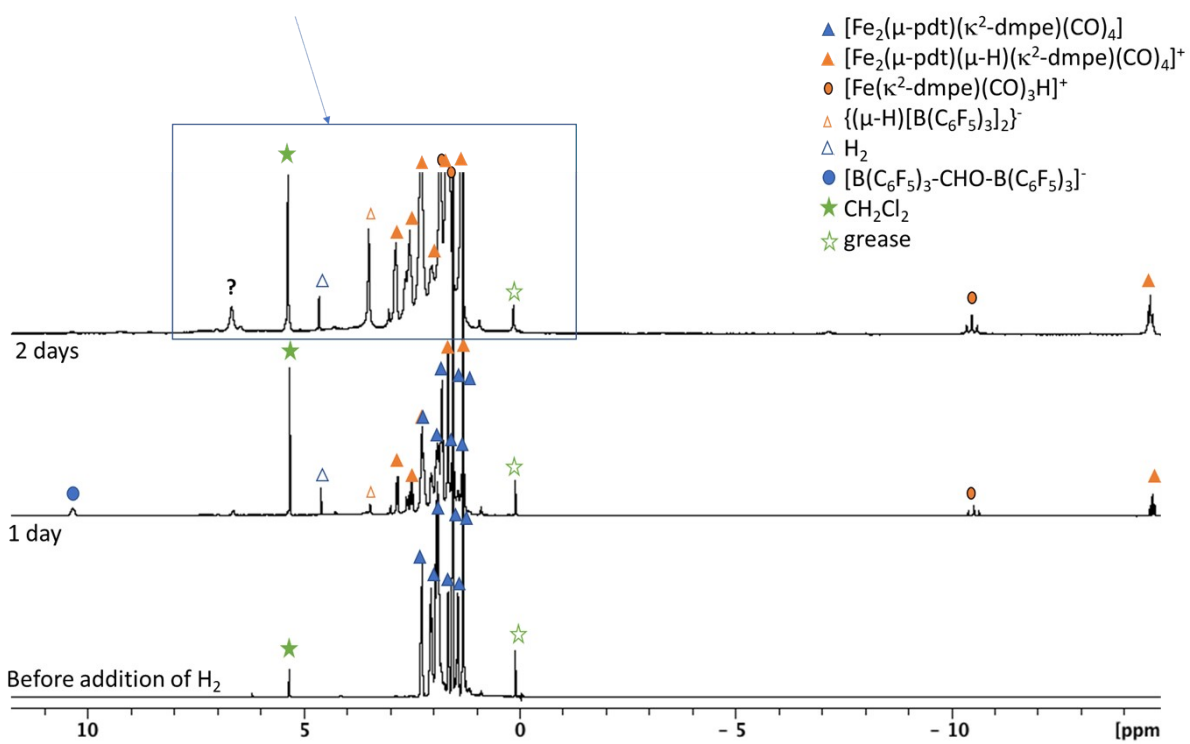

Figure S10:  $^1\text{H}$  NMR (400 MHz, 298K) spectra of the solution mixture  $[\text{Fe}_2(\mu\text{-pdt})(\kappa^2\text{-dmpe})(\text{CO})_4]$  and 2 equivalents of  $\text{B}(\text{C}_6\text{F}_5)_3$  in  $\text{CD}_2\text{Cl}_2$  before and after addition of  $\text{H}_2$

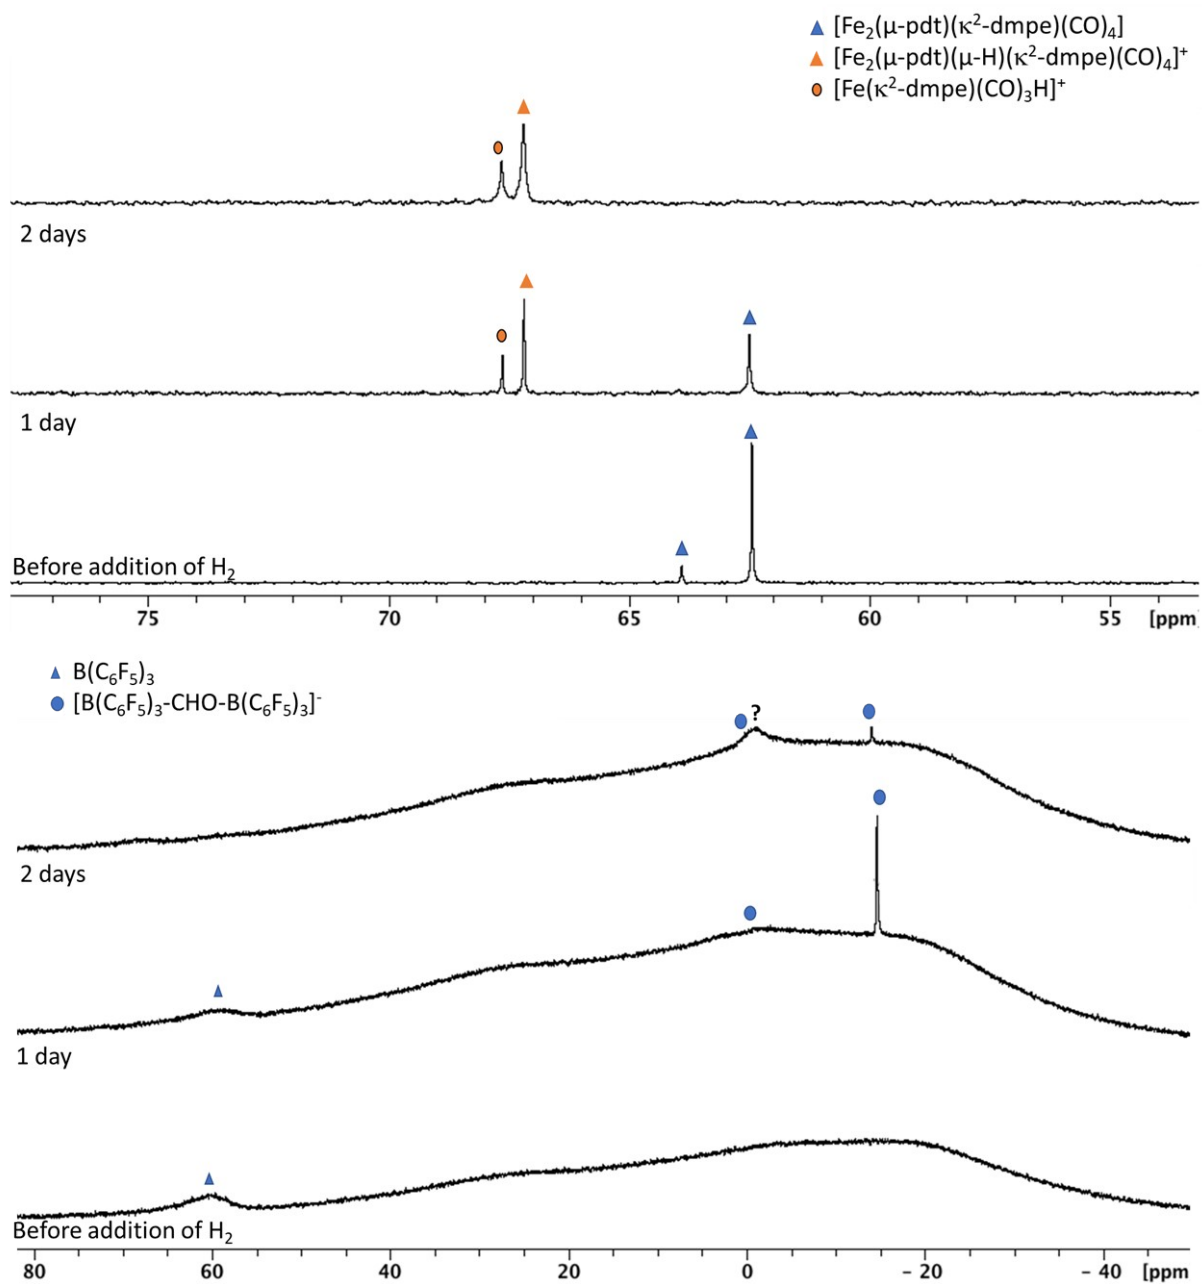

Figure S11: NMR (298K,  $\text{CD}_2\text{Cl}_2$ ) spectra of the solution mixture  $[\text{Fe}_2(\mu\text{-pdt})(\kappa^2\text{-dmpe})(\text{CO})_4]$  and 2 equivalents of  $\text{B}(\text{C}_6\text{F}_5)_3$  in  $\text{CD}_2\text{Cl}_2$  before and after addition of  $\text{H}_2$  (top)  $^{31}\text{P}$  (161.97 MHz) and (bottom)  $^{11}\text{B}$  (128.38 MHz)

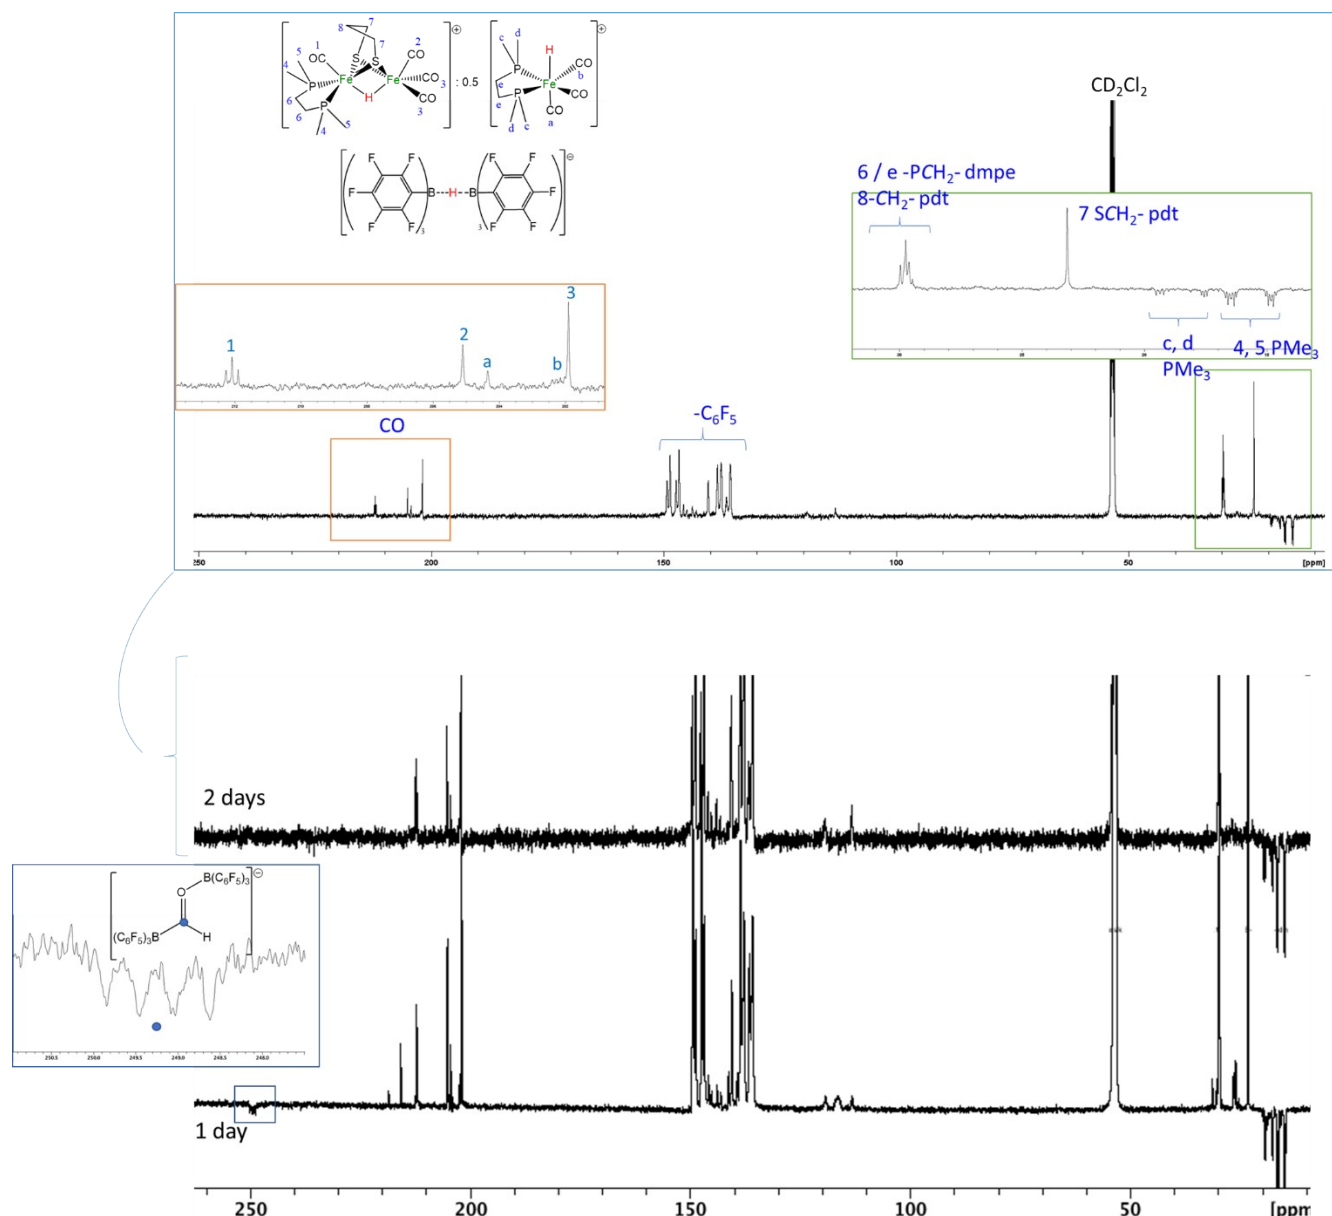

Figure S12:  $^{13}\text{C}$  (125.76 MHz, 298 K) NMR spectra of the solution mixture  $[\text{Fe}_2(\mu\text{-pdt})(\kappa^2\text{-dmpe})(\text{CO})_4]$  and 2 equivalents of  $\text{B}(\text{C}_6\text{F}_5)_3$  in  $\text{CD}_2\text{Cl}_2$  after addition of  $\text{H}_2$  showing the disappearance of the formyl borate species after 2 days at room temperature

### Low temperature experiments

To a J. Young NMR tube containing both solids of  $\text{B}(\text{C}_6\text{F}_5)_3$  (0.043 mmol, 1 equiv.) and **2** (0.043 mmol, 1 equiv.) was added under a 1 atm. pressure of  $\text{H}_2$  0.5 mL of cold  $\text{CD}_2\text{Cl}_2$  ( $-70^\circ\text{C}$ ). The tube was kept at  $-70^\circ\text{C}$  until its introduction to the precooled NMR spectrometer. NMR analysis were then carried on.

A terminal hydride species  $[\text{Fe}_2(\mu\text{-pdt})(\text{H}_i)(\kappa^2\text{-dmpe})(\text{CO})_4]^+$  is formed and remains observable until 253 K. At higher temperature it converts into the apical-basal and basal-basal bridging hydride isomers  $[\text{Fe}_2(\mu\text{-pdt})(\mu\text{-H})(\kappa^2\text{-dmpe})(\text{CO})_4]^+$ , the thermodynamic complex is the only isomer remaining after one night at room temperature. The second hydride arising from the  $\text{H}_2$  splitting forms a broad singlet at room temperature at 6.6 ppm (defined as a triplet at 203 K ( $J = 16$  Hz)) probably due to the stabilization of an unidentified structure between hydride and  $\text{B}(\text{C}_6\text{F}_5)_3$ . Once formed at low temperature this species is stable at room temperature and addition of MeCN allows the formation of the known hydrido-borate anion  $[\text{HB}(\text{C}_6\text{F}_5)_3]^-$ .

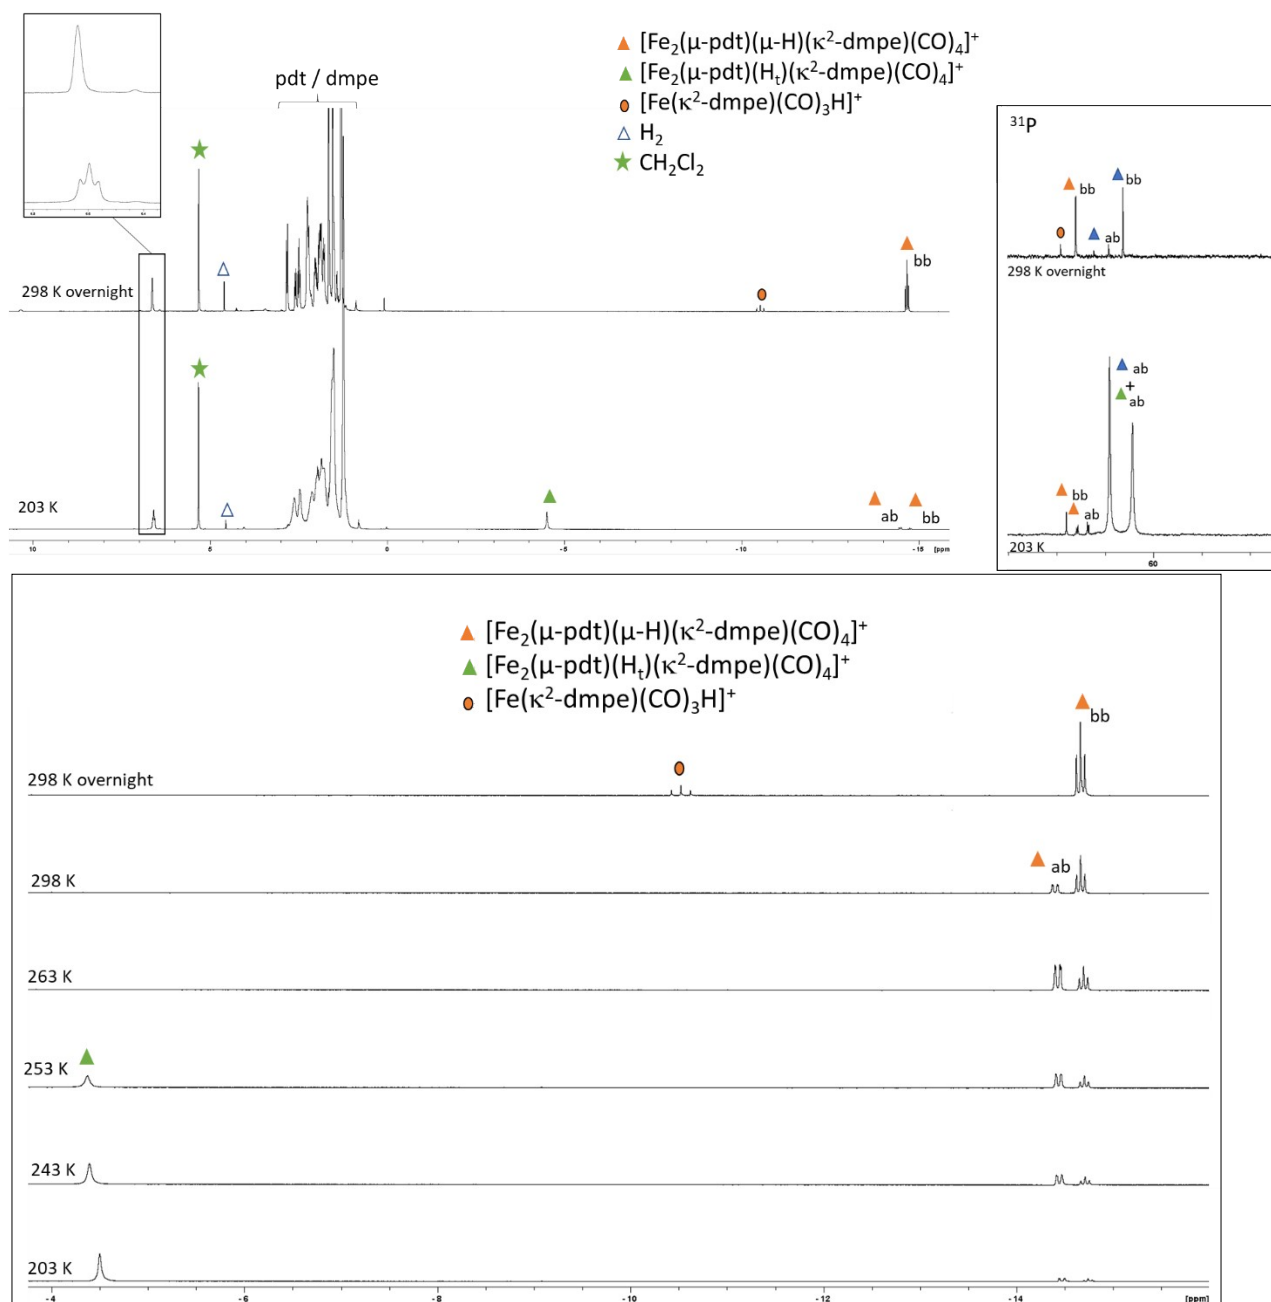

Figure S13.  $^1\text{H}$  (500 MHz) NMR spectra and inserts of  $^{31}\text{P}$  (202.46 MHz) and  $^1\text{H}$  NMR spectra at the negative region of a 1:1 solution of  $[\text{Fe}_2(\mu\text{-pdt})(\kappa^2\text{-dmpe})(\text{CO})_4] : \text{B}(\text{C}_6\text{F}_5)_3$  in  $\text{CD}_2\text{Cl}_2$  exposed to  $\text{H}_2$  at  $-70^\circ\text{C}$  and recorded at 203 K before warming up to reach 298 K.

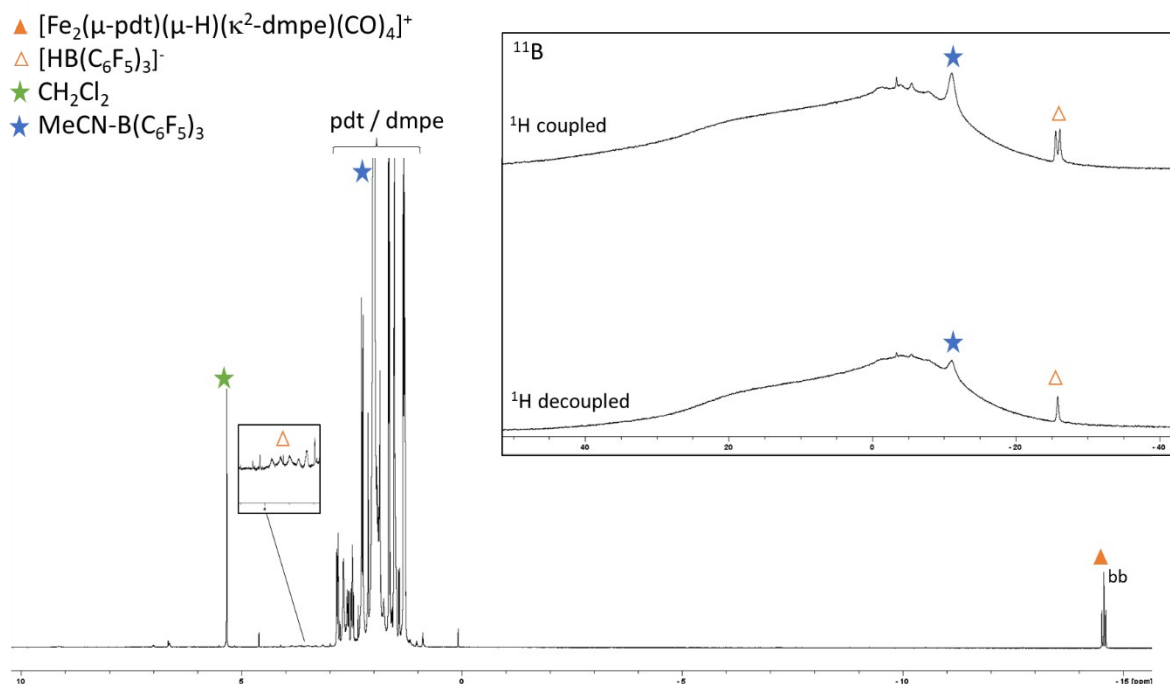

Figure S14.  $^1\text{H}$  (500 MHz) NMR spectra and inserts of  $^{11}\text{B}$  (160.46 MHz) of a 1:1 solution of  $[\text{Fe}_2(\mu\text{-pdt})(\kappa^2\text{-dmpe})(\text{CO})_4]^+ : \text{B}(\text{C}_6\text{F}_5)_3$  in  $\text{CD}_2\text{Cl}_2$  initially exposed to  $\text{H}_2$  at  $-70^\circ\text{C}$  and let stabilized at 298K before addition of MeCN, showing the conversion of the broad singlet at 6.6 ppm in  $^1\text{H}$  NMR to the known quadruplet of the  $[\text{HB}(\text{C}_6\text{F}_5)_3]^-$  anion at 3.5 ppm. The  $^{11}\text{B}$  NMR spectra also revealed the formation of this same anion together with the  $\text{MeCN-B}(\text{C}_6\text{F}_5)_3$  adduct.

### Reactivity using $\text{B}(\text{C}_6\text{H}_5)_3$ instead of $\text{B}(\text{C}_6\text{F}_5)_3$

A  $\text{CD}_2\text{Cl}_2$  solution of  $\text{B}(\text{C}_6\text{H}_5)_3$  (0.052 mmol, 1 equiv.) and **1** or **2** (0.052 mmol, 1 equiv.) in J. Young NMR tube was exposed to  $\text{H}_2$  (1 atm.) and followed by NMR analysis for 5 days. No reactivity was observed.

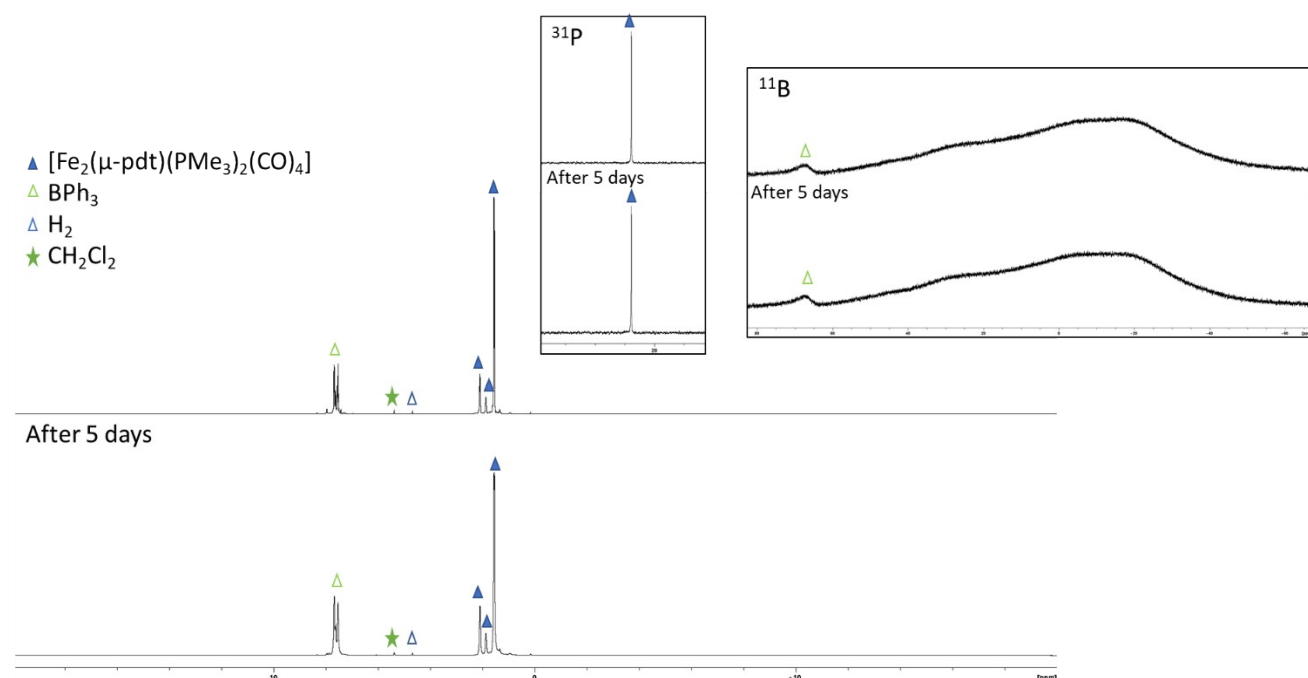

Figure S15.  $^1\text{H}$  (400 MHz) and inserts of  $^{31}\text{P}$  (161.97 MHz) and  $^{11}\text{B}$  (128.38 MHz) NMR spectra of a 1:1 solution of  $[\text{Fe}_2(\mu\text{-pdt})(\text{PMe}_3)_2(\text{CO})_4] : \text{B}(\text{C}_6\text{H}_5)_3$  in  $\text{CD}_2\text{Cl}_2$  after 5 days of  $\text{H}_2$  exposure recorded at 298 K

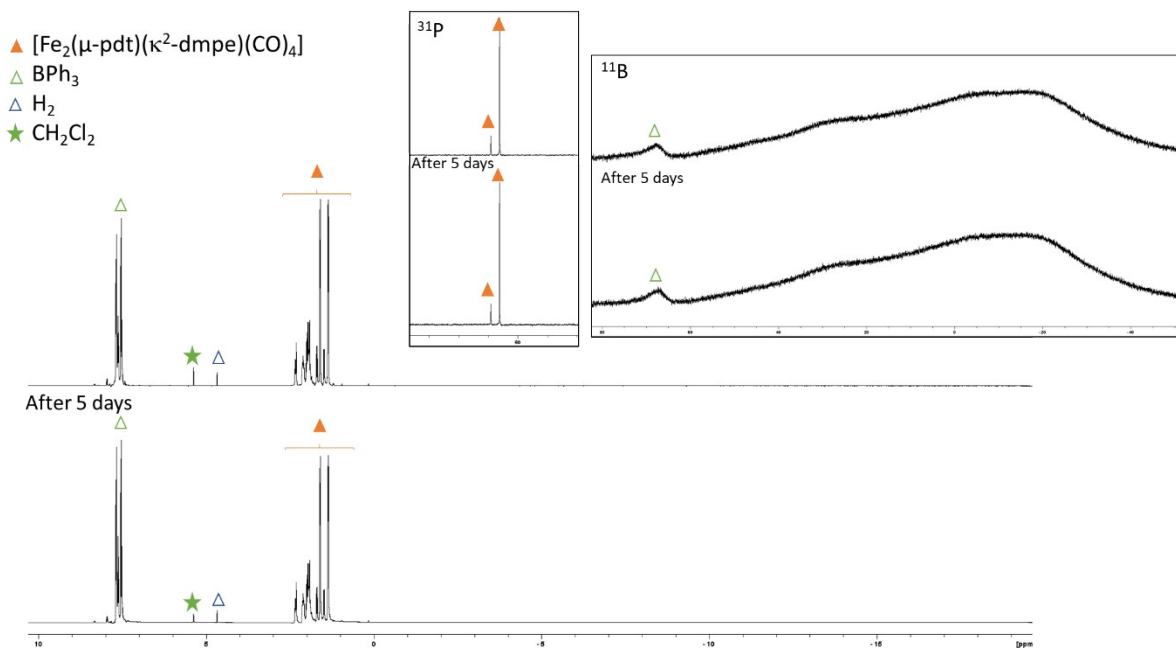

Figure S16.  $^1\text{H}$  (400 MHz) and inserts of  $^{31}\text{P}$  (161.97 MHz) and  $^{11}\text{B}$  (128.38 MHz) NMR spectra of a 1:1 solution of  $[\text{Fe}_2(\mu\text{-pdt})(\kappa^2\text{-dmpe})(\text{CO})_4] : \text{B}(\text{C}_6\text{H}_5)_3$  in  $\text{CD}_2\text{Cl}_2$  after 5 days of  $\text{H}_2$  exposure recorded at 298 K

### Activation of $\text{H}_2\text{O}$

The addition of 5 equiv. of  $\text{H}_2\text{O}$  to a  $\text{CD}_2\text{Cl}_2$  solution of **1** (0.041 mmol, 1 equiv.) and  $\text{B}(\text{C}_6\text{F}_5)_3$  (0.041 mmol, 1 equiv.) in J. Young NMR tube was followed by NMR analysis and revealed the conversion of **1** into the bridging hydride cation  $[\text{Fe}_2(\mu\text{-pdt})(\mu\text{-H})(\text{PMe}_3)_2(\text{CO})_4]^+$  in 50% yield. The  $^{11}\text{B}$  NMR did not reveal any distinctive resonance.

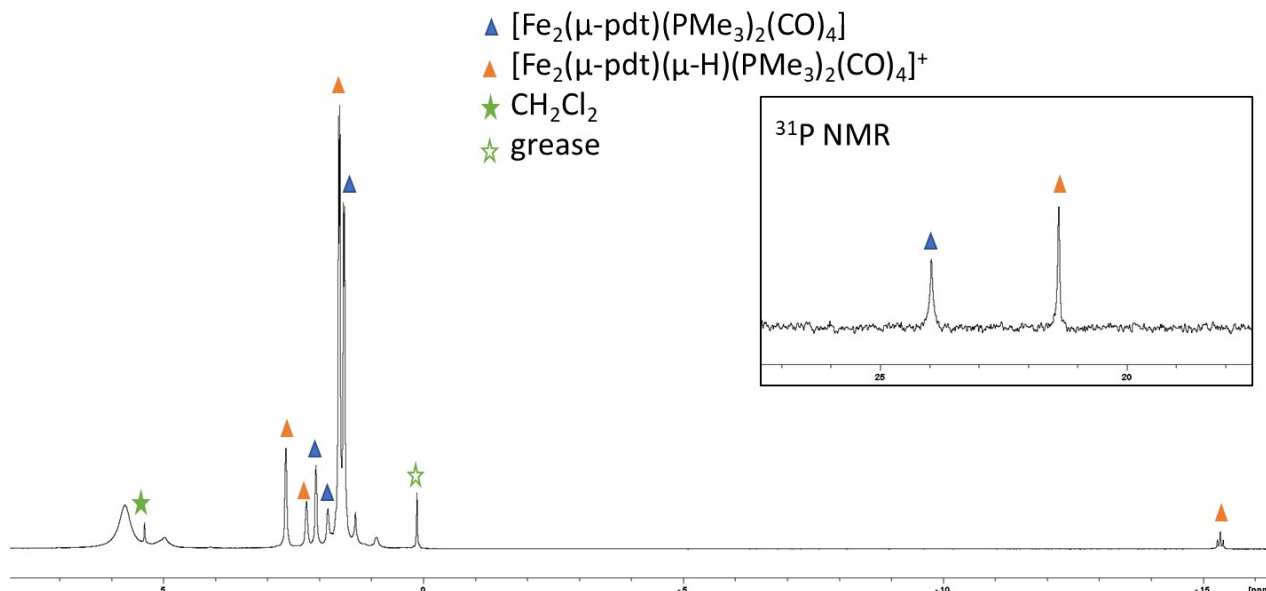

Figure S17:  $^1\text{H}$  (400MHz, 298K) and insert  $^{31}\text{P}$  (161.98 MHz, 298K) NMR spectra of a 1:1 solution of  $[\text{Fe}_2(\mu\text{-pdt})(\text{PMe}_3)_2(\text{CO})_4] : \text{B}(\text{C}_6\text{F}_5)_3$  in  $\text{CD}_2\text{Cl}_2$  in presence of 5equiv.  $\text{H}_2\text{O}$  after 24h

## II. IR spectra

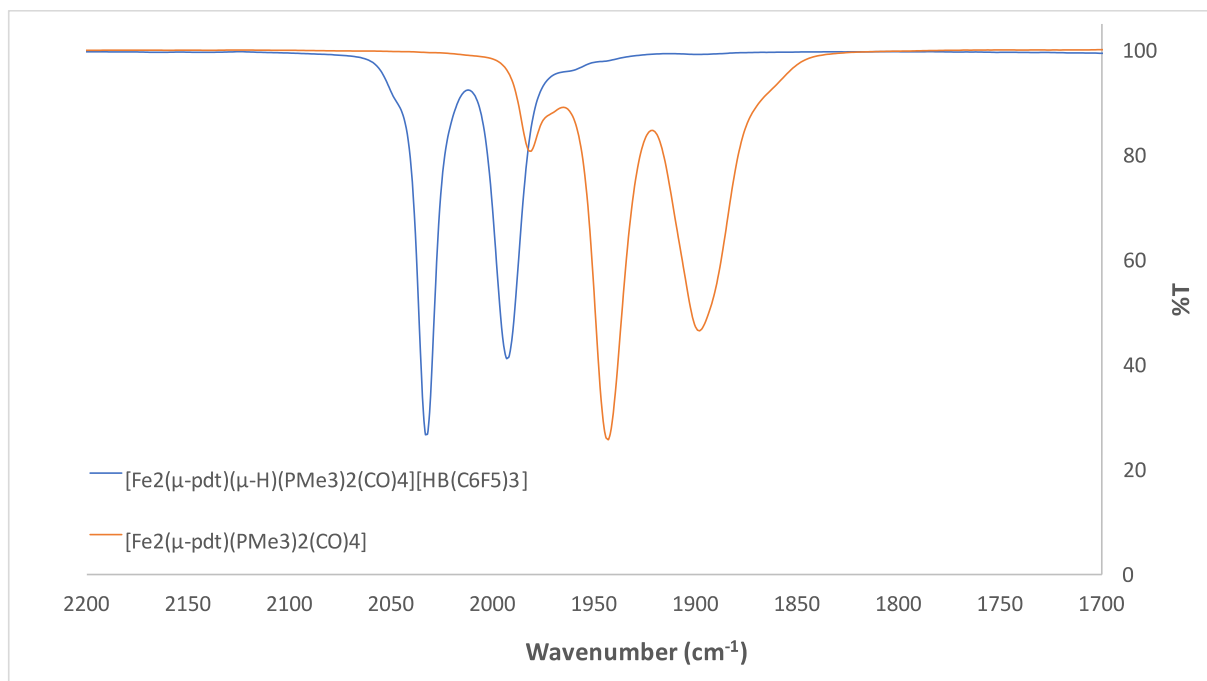

Figure S18: IR spectra of [Fe<sub>2</sub>(μ-pdt)(μ-H)(PMe<sub>3</sub>)<sub>2</sub>(CO)<sub>4</sub>][HB(C<sub>6</sub>F<sub>5</sub>)<sub>3</sub>] and [Fe<sub>2</sub>(μ-pdt)(PMe<sub>3</sub>)<sub>2</sub>(CO)<sub>4</sub>] in CH<sub>2</sub>Cl<sub>2</sub> solution

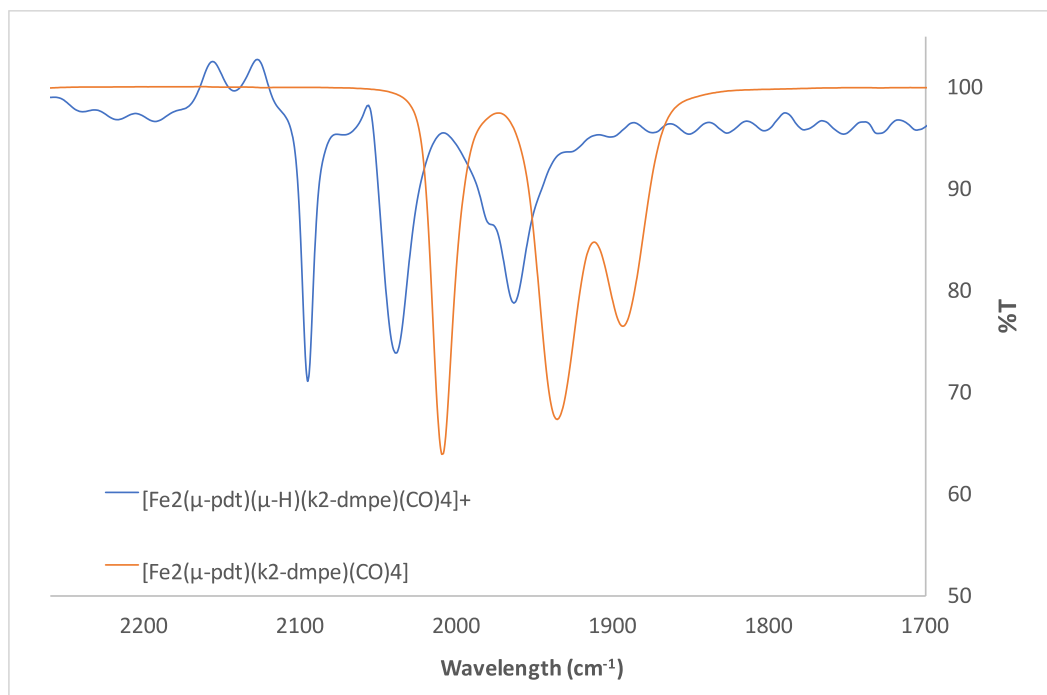

Figure S19: IR spectra of [Fe<sub>2</sub>(μ-pdt)(μ-H)(κ<sup>2</sup>-dmpe)(CO)<sub>4</sub>][HB(C<sub>6</sub>F<sub>5</sub>)<sub>3</sub>] and [Fe<sub>2</sub>(μ-pdt)(κ<sup>2</sup>-dmpe)(CO)<sub>4</sub>] in CH<sub>2</sub>Cl<sub>2</sub> solution



### III. DFT calculations

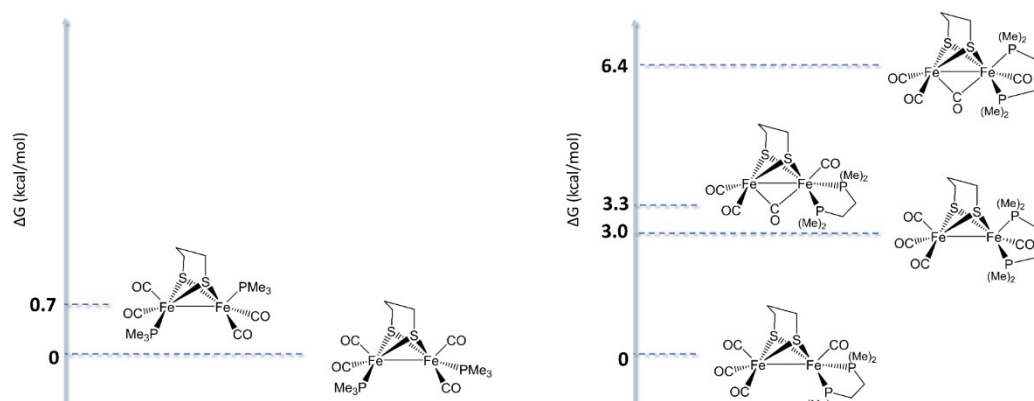

Figure S20: Relative stability between basal-basal and apical-basal isomers of **1** (left) and **2** (right).

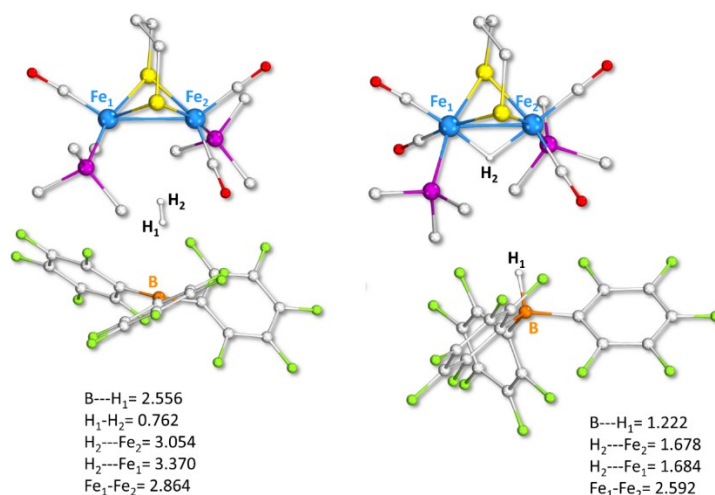

Figure S21: Optimized structure of selected intermediates. Reactant (left) and product (right) of the  $H_2$  splitting step in **1**, along **1-TS<sub>bb</sub>** (see Figure 1). Selected distances are in Å. Colors legend: grey = carbon; red = oxygen; light blue = iron; purple = phosphorus; yellow = sulfur; orange = boron; green = fluorine.

| BP86-D3             |       |       |       |       |      | B3LYP-D3            |       |       |       |       |      |
|---------------------|-------|-------|-------|-------|------|---------------------|-------|-------|-------|-------|------|
| NBO                 |       |       |       |       |      | NBO                 |       |       |       |       |      |
|                     | Fe1   | Fe2   | H1    | H2    | B    |                     | Fe1   | Fe2   | H1    | H2    | B    |
| 1 <sub>bb</sub>     | -0,15 | -0,15 | -0,02 | 0,01  | 0,75 | 1 <sub>bb</sub>     | -0,12 | -0,11 | -0,05 | 0,01  | 0,82 |
| 1-TS <sub>bb</sub>  | -0,23 | -0,19 | 0,04  | -0,04 | 0,26 | 1-TS <sub>bb</sub>  | -0,2  | -0,13 | -0,06 | 0,02  | 0,28 |
| 1 <sub>ab</sub>     | -0,22 | -0,20 | 0,00  | 0,01  | 0,79 | 1 <sub>ab</sub>     | -0,2  | -0,17 | 0,00  | 0,01  | 0,85 |
| 1-TS <sub>ab</sub>  | -0,21 | -0,19 | 0,12  | -0,08 | 0,26 | 1-TS <sub>ab</sub>  | -0,19 | -0,15 | 0,13  | -0,11 | 0,33 |
| 2 <sub>bb</sub>     | -0,18 | -0,15 | -0,04 | 0,01  | 0,75 | 2 <sub>bb</sub>     | -0,18 | -0,07 | 0,01  | 0,04  | 0,82 |
| 2-TS <sub>bb</sub>  | -0,18 | -0,16 | -0,05 | -0,03 | 0,2  | 2-TS <sub>bb</sub>  | -0,16 | -0,06 | -0,08 | -0,05 | 0,22 |
| 2 <sub>ab</sub>     | -0,15 | -0,13 | -0,04 | 0,00  | 0,74 | 2 <sub>ab</sub>     | -0,16 | -0,05 | -0,05 | 0,04  | 0,82 |
| 2-TS <sub>ab</sub>  | -0,16 | -0,14 | -0,01 | -0,03 | 0,16 | 2-TS <sub>ab</sub>  | -0,13 | -0,04 | 0,06  | 0,03  | 0,18 |
| 2-Int <sub>bb</sub> | -0,33 | -0,32 | 0,12  | 0,00  | 0,09 | 2-Int <sub>bb</sub> | -0,25 | -0,32 | 0,12  | -0,02 | 0,12 |
| 2-Int <sub>ab</sub> | -0,34 | -0,27 | 0,11  | 0,02  | 0,04 | 2-Int <sub>ab</sub> | -0,32 | -0,21 | 0,11  | 0,01  | 0,07 |

---

| Löwdin              |       |       |      |      |       | Löwdin              |       |       |      |      |       |
|---------------------|-------|-------|------|------|-------|---------------------|-------|-------|------|------|-------|
|                     | Fe1   | Fe2   | H1   | H2   | B     |                     | Fe1   | Fe2   | H1   | H2   | B     |
| 1 <sub>bb</sub>     | -0,62 | -0,60 | 0,03 | 0,01 | 0,01  | 1 <sub>bb</sub>     | -0,75 | -0,75 | 0,00 | 0,03 | -0,06 |
| 1-TS <sub>bb</sub>  | -0,64 | -0,63 | 0,11 | 0,07 | -0,21 | 1-TS <sub>bb</sub>  | -0,8  | -0,75 | 0,12 | 0,07 | -0,31 |
| 1 <sub>ab</sub>     | -0,63 | -0,63 | 0,04 | 0,04 | 0,02  | 1 <sub>ab</sub>     | -0,76 | -0,75 | 0,04 | 0,04 | -0,06 |
| 1-TS <sub>ab</sub>  | -0,63 | -0,63 | 0,14 | 0,04 | -0,13 | 1-TS <sub>ab</sub>  | -0,76 | -0,75 | 0,14 | 0,07 | -0,21 |
| 2 <sub>bb</sub>     | -0,69 | -0,56 | 0,03 | 0,01 | 0,02  | 2 <sub>bb</sub>     | -0,8  | -0,72 | 0,01 | 0,04 | -0,05 |
| 2-TS <sub>bb</sub>  | -0,68 | -0,54 | 0,08 | 0,04 | -0,26 | 2-TS <sub>bb</sub>  | -0,79 | -0,69 | 0,11 | 0,03 | -0,31 |
| 2 <sub>ab</sub>     | -0,65 | -0,54 | 0,04 | 0,04 | 0,01  | 2 <sub>ab</sub>     | -0,63 | -0,57 | 0,02 | 0,03 | 0,04  |
| 2-TS <sub>ab</sub>  | -0,66 | -0,52 | 0,11 | 0,05 | -0,24 | 2-TS <sub>ab</sub>  | -0,75 | -0,73 | 0,12 | 0,07 | -0,35 |
| 2-Int <sub>bb</sub> | -0,56 | -0,73 | 0,13 | 0,06 | -0,27 | 2-Int <sub>bb</sub> | -0,59 | -0,72 | 0,13 | 0,05 | -0,26 |
| 2-Int <sub>ab</sub> | -0,58 | -0,70 | 0,13 | 0,05 | -0,29 | 2-Int <sub>ab</sub> | -0,59 | -0,69 | 0,12 | 0,04 | -0,28 |

Table S1: NBO and Löwdin analysis for selected species, performed at the BP86-D3 and B3LYP-D3 (single point calculations on BP86-D3 optimized geometries) levels. For atom numbering refer to Figure 1, 2 and 3 of the main text.

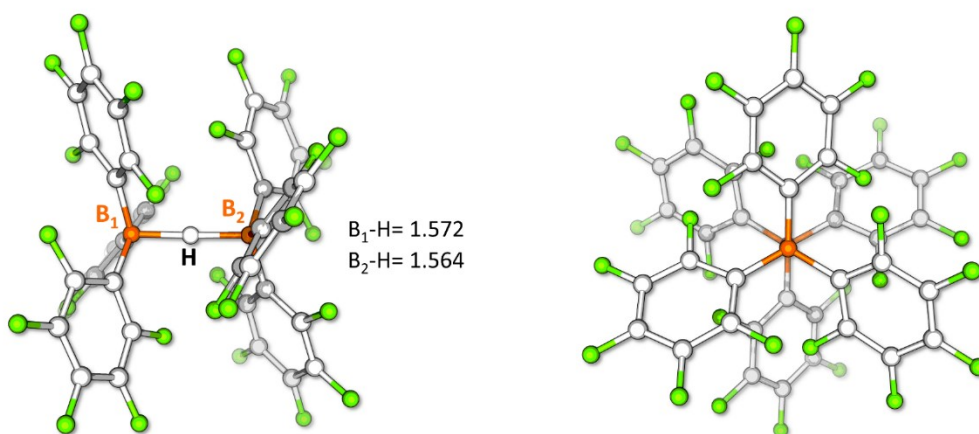

Figure S22: Optimized structures of the  $[(C_6F_5)_3B-(\mu-H)-B(C_6F_5)_3]$  bridging hydride. This species is formed upon the coupling:  $B(C_6F_5)_3 + [HB(C_6F_5)_3]^- \rightarrow [(C_6F_5)_3B-(\mu-H)-B(C_6F_5)_3]$ , an exergonic process by  $-10.2$  kcal/mol. The  $\Delta G$  of the coupling has been calculated as free energy difference between the bridging hydride product and a van der Waals adduct formed by one molecule of each reactant. Selected distances are in Å. Colors legend: grey = carbon; red = oxygen; light blue = iron; purple = phosphorus; yellow = sulfur; orange = boron; green = fluorine.
